# Supplementary material for: Flying-seed-like liquid crystals 3: new guideline for the induction of mesomorphism by using bulky groups instead of long alkyl chains
Source: Royal Society of Chemistry journal article supplement (doi:10.1039/c3tc30584h), 2013-01-01
Supplement: c3tc30584h.pdf [file c3tc30584h.pdf]

## Supplementary Information

### Flying-seed-like liquid crystals 3: New guideline for induction of mesomorphism by using bulky groups instead of long alkyl chains

Ayaha Hachisuga, Miho Yoshioka, Kazuchika Ohta\* and Tomoyuki Itaya

#### Synthesis

##### 4-[4-(1,1-diphenylethyl)phenoxy]benzoic acid (3b)

A 50 ml of three-necked flask with a condenser was dried by a heat gun under nitrogen atmosphere. Into this flask, *p*-nitrobenzoic acid (0.18 g, 1.1mmol), distilled DMF (5 ml), K<sub>2</sub>CO<sub>3</sub> (0.35 g, 2.5mmol), and 4-(1,1-diphenylethyl)phenol (**2b**: 0.30 g, 1.1mmol) was poured. It was heated with stirring under dry nitrogen atmosphere at 150 °C for 12 hours. After cooling to rt, it was neutralised by adding a 10% hydrochloric acid dilute aqueous solution, and then extracted with diethyl ether and washed with NaCl saturated aqueous solution. The organic layer was dried over sodium sulphate and dried in vacuo. The residue was recrystallised from CHCl<sub>3</sub> to afford 0.14 g of light yellow solid in a 33% yield. M.p.: see Table 2.

IR(KBr): 3390 (-OH), 1725 (C=O), 1279 (ether) cm<sup>-1</sup>

<sup>1</sup>H-NMR (DMSO-d<sub>6</sub>: TMS) δ 2.14 (3H, s, -CH<sub>3</sub>), 6.74 (2H, d, J = 9.1 Hz, aromatic -H), 6.90 (2H, d, J = 9.0 Hz, aromatic -H), 7.10 ~ 7.35 (14H, m, aromatic -H), 9.42 (1H, s, COO-H).

##### 4-[4-(1-Methyl-1-phenylethyl)phenoxy]benzoic acid (3c)

A 100 ml of three-necked flask with a condenser was dried by a heat gun under nitrogen atmosphere. Into this flask, *p*-nitrobenzoic acid (0.41 g, 2.5mmol), distilled DMF (5 ml), K<sub>2</sub>CO<sub>3</sub> (0.83 g, 6.0mmol), and 4- $\alpha$ -cumylphenol (**2c**: 0.58 g, 2.7mmol) was poured. It was heated with stirring under dry nitrogen atmosphere at 150 °C for 12 hours. After cooling to rt, it was neutralised by adding a 10% hydrochloric acid dilute aqueous solution, and then extracted with diethyl ether and washed with NaCl saturated aqueous solution. The organic layer was dried over sodium sulphate and dried in vacuo. The residue was recrystallised from CHCl<sub>3</sub> to afford 0.46 g of white solid in a 58% yield. M.p.: see Table 2.

IR(KBr): 3400 (-OH), 1695 (C=O), 1254 (ether) cm<sup>-1</sup>

<sup>1</sup>H-NMR (DMSO-d<sub>6</sub>: TMS) δ 1.75 (6H, s, -CH<sub>3</sub>), 7.05 (2H, d, J = 9.1 Hz, aromatic -H), 7.26~7.45 (9H, m, aromatic -H), 7.91 (2H, 9.0Hz, aromatic -H), 9.18 (1H, s, COO-H).

##### 4-(4-tert-butylphenoxy)benzoic acid (3d)

A 100 ml of three-necked flask with a condenser was dried by a heat gun under nitrogen atmosphere. Into this flask, *p*-nitrobenzoic acid (0.33 g, 2.0mmol), distilled DMF (5 ml), K<sub>2</sub>CO<sub>3</sub> (0.69 g, 5.0mmol), and 4- $\alpha$ -cumylphenol (**2d**: 0.58 g, 2.7mmol) was poured. It was heated with stirring under dry nitrogen atmosphere at 110 °C for 3 hours. After cooling to rt, it was neutralised by adding a 10% hydrochloric acid dilute aqueous solution, and then extracted with diethyl ether and washed with NaCl saturated aqueous solution. The organic layer was dried over sodium sulphate and dried in vacuo. The residue was recrystallised from CHCl<sub>3</sub> to afford 0.24 g of white solid in a 45% yield. M.p.: see Table 2.

IR(KBr): 3556 (Ar-OH), 1693 (C=O), 1239 (ether) cm<sup>-1</sup>

<sup>1</sup>H-NMR (DMSO-d<sub>6</sub>: TMS) δ 1.31 (9H, s, -CH<sub>3</sub>), 7.04 (4H, m, aromatic -H), 7.43 (2H, d, J = 9.1 Hz, aromatic -H), 7.89 (2H, d, J = 8.9Hz, aromatic -H), 13.7 (1H, s, COO-H).

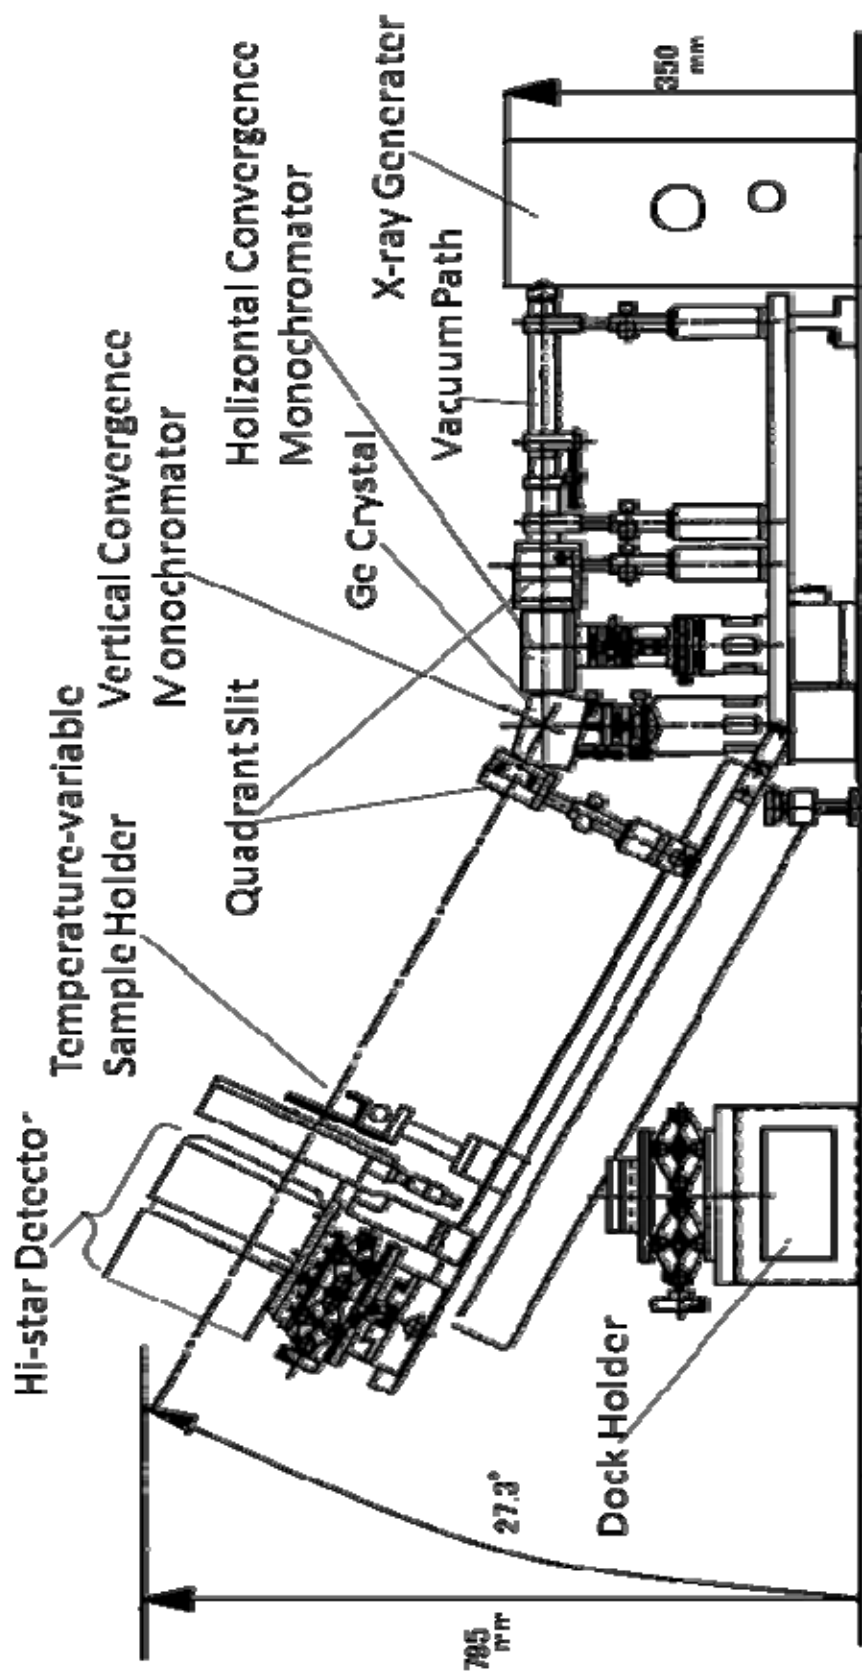

**Fig. S1. Setup of Small-Angle X-ray Scattering (Bruker MACSAXS ) equipped with a temperature-variable sample holder.**

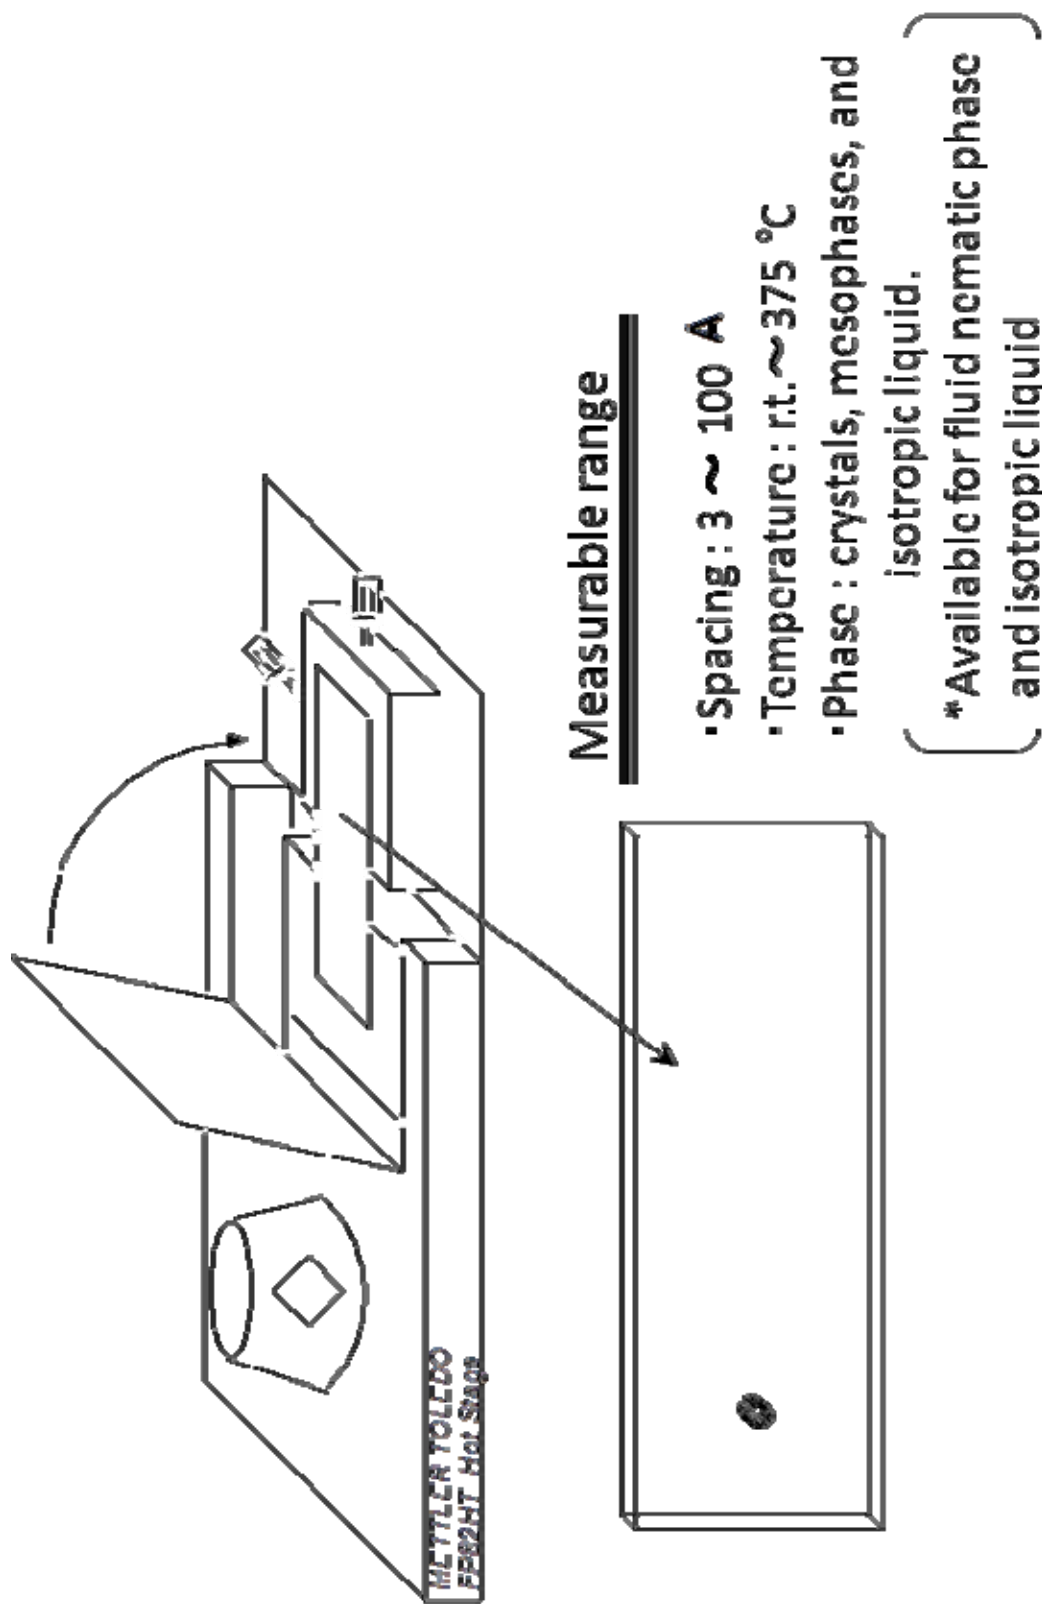

**Fig. S2. Setup of the temperature-variable sample holder.**
